# Supplementary material
Source: PubMed Central journal article supplement (PMC5766913)
Supplement: supp_RA117.000405_133094_1_supp_20926_yz2bty.pdf [file supp_RA117.000405_133094_1_supp_20926_yz2bty.pdf]

## Supplemental Data

### Heart failure–induced activation of phospholipase iPLA<sub>2</sub>γ generates hydroxyeicosatetraenoic acids opening the mitochondrial permeability transition pore

Sung Ho Moon<sup>1</sup>, Xinping Liu<sup>1</sup>, Ari M. Cedars<sup>1,\*</sup>, Kui Yang<sup>1,\*</sup>, Michael A. Kiebish<sup>1,\*</sup>, Susan M. Joseph<sup>2,\*</sup>, John Kelley<sup>1,\*</sup>, Christopher M. Jenkins<sup>1</sup>, Richard W. Gross<sup>1,3,4,5</sup>

*From the <sup>1</sup>Division of Bioorganic Chemistry and Molecular Pharmacology, the Department of Medicine, the <sup>2</sup>Cardiovascular Division, the Department of Medicine, the <sup>3</sup>Department of Developmental Biology, and the <sup>4</sup>Center for Cardiovascular Research, the Department of Medicine, Washington University School of Medicine, Saint Louis, Missouri 63110 and the <sup>5</sup>Department of Chemistry, Washington University, Saint Louis, Missouri 63130*

#### Address correspondence to:

Richard W. Gross, M.D., Ph.D.  
Division of Bioorganic Chemistry and Molecular Pharmacology  
Washington University School of Medicine  
660 S. Euclid Ave., Campus Box 8020  
St. Louis, MO 63110  
Tel.: 314-362-2690  
Fax: 314-362-1402  
Email: [rgross@wustl.edu](mailto:rgross@wustl.edu).

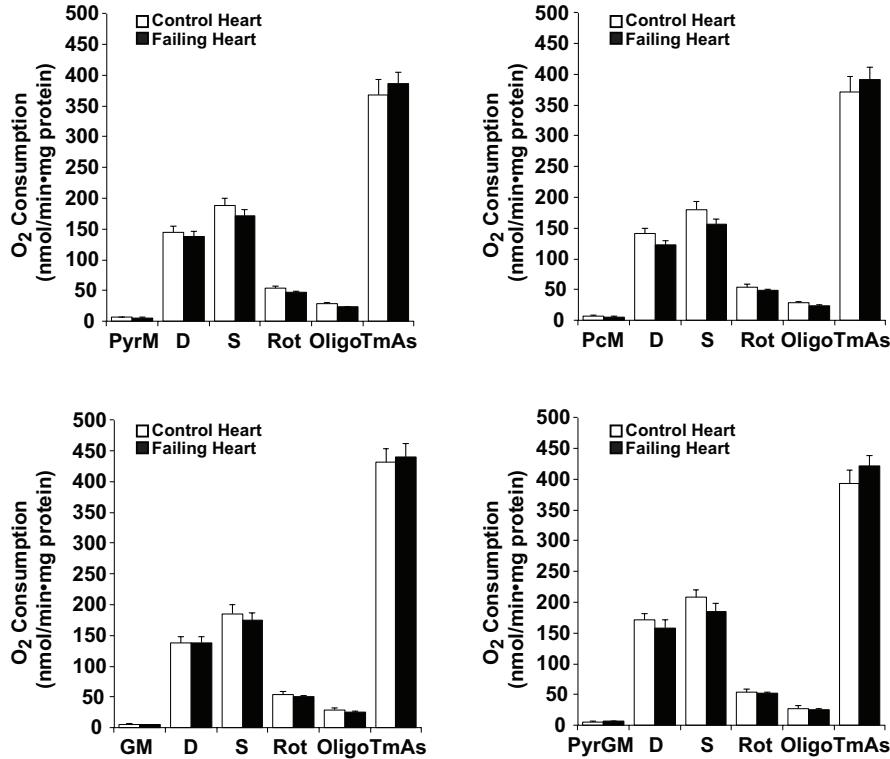

**Supplemental Figure 1.** High resolution respirometry of human heart mitochondria. Myocardial mitochondria isolated from non-failing (control) (n=11) and failing (n=26) human hearts were placed in ice-cold MiRO5 buffer. High resolution respirometry was performed using 50  $\mu$ g mitochondria in a 2 ml chamber OROBOROS® Oxygraph 2K at 30°C. Mitochondrial respiration was initiated by the addition of either 5 mM pyruvate/ 5mM malate (PyrM), 20  $\mu$ M palmitoylcarnitine /malate (PcM), 10 mM glutamate/malate (GM), or pyruvate/glutamate/malate (PyrGM) [State 2] followed by sequential addition of 1.25 mM ADP (D) [State 3], 5 mM succinate (S) [State 3 Max], 0.5  $\mu$ M rotenone (Rot), 2.5  $\mu$ M oligomycin (Oligo) [State 4], 5  $\mu$ M *N,N,N,N*-tetramethyl-*p*-phenylenediamine with 0.5 mM ascorbate (TmAs) and antimycin A (1  $\mu$ M). All values reflect the subtraction of residual oxygen consumption after addition of antimycin A.

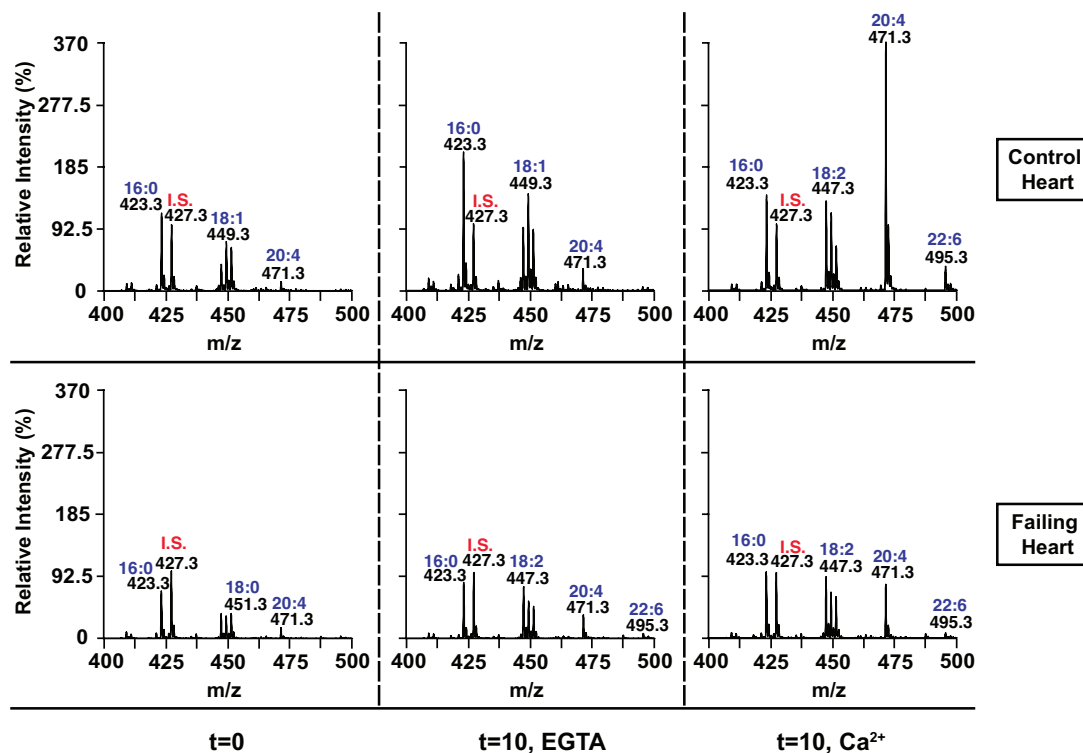

**Supplemental Figure 2.** Mass spectrometric analysis of fatty acids released from endogenous human heart mitochondrial phospholipids in the absence and presence of Ca<sup>2+</sup>. Mitochondria from human non-failing (control) and failing hearts were placed in HEPES buffer (10 mM HEPES (pH 7.4) containing 1 mM DTT and 10 % glycerol) prior to brief sonication. Mitochondrial phospholipase activity was initiated by addition of either 2 mM EGTA or 0.6 mM free Ca<sup>2+</sup> (final concentration) and incubated for 10 min at 35°C. Free fatty acids were extracted into chloroform, derivatized with AMPP and analyzed using a TSQ Quantum Ultra mass spectrometer in the positive ion mode through precursor ion scanning of m/z 183. Representative spectra for AMPP-derivatized fatty acids including palmitic acid (16:0), stearic acid (18:0), oleic acid (18:1), linoleic acid (18:2), arachidonic acid (20:4) and docosahexaenoic acid (22:6) with internal fatty acid standard (I.S., d<sub>4</sub>-16:0 FFA) are shown.

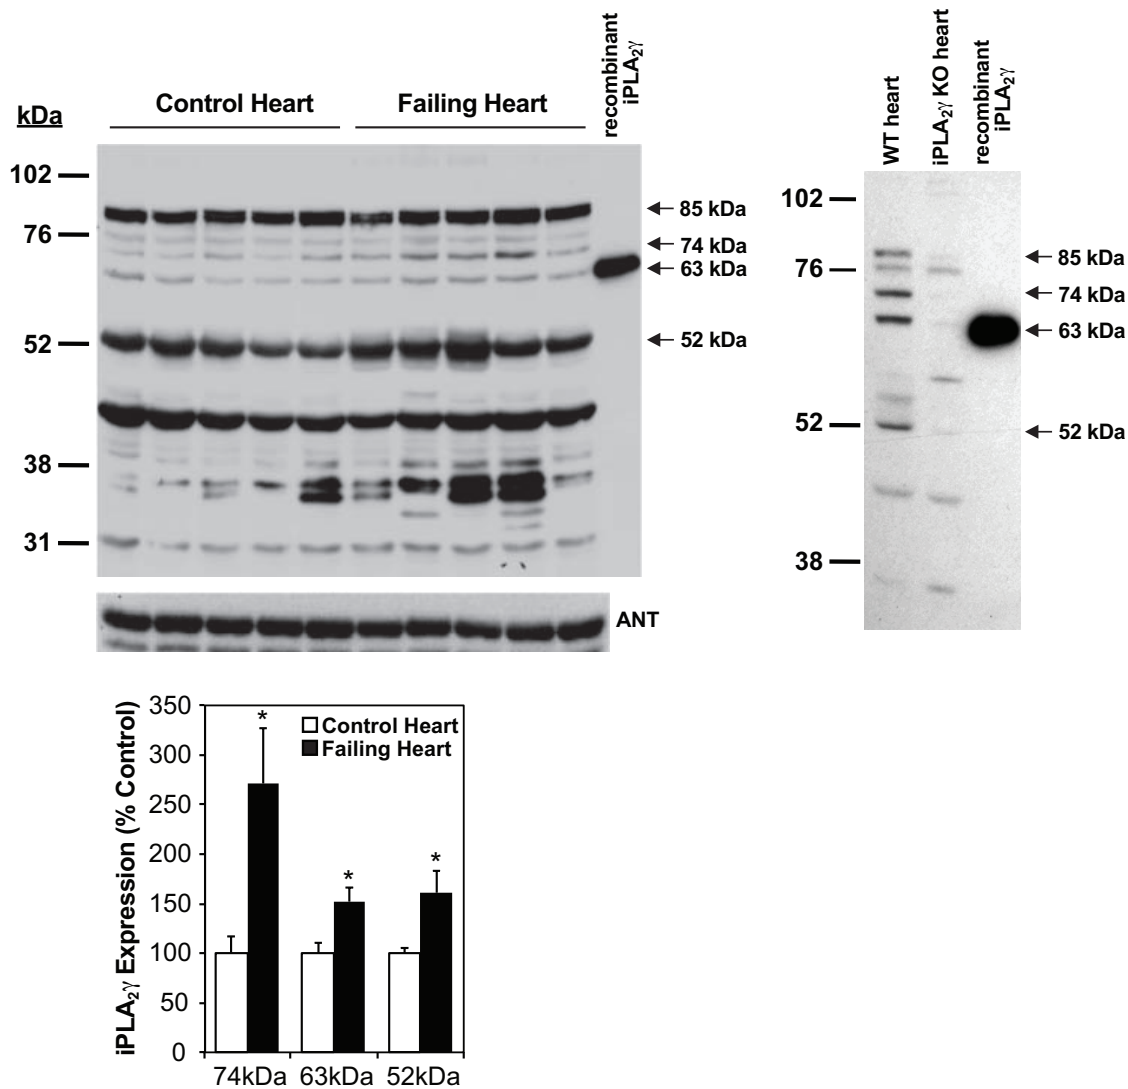

**Supplemental Figure 3.** Comparison of iPLA<sub>2</sub>γ isoform expression levels in mitochondria isolated from human non-failing control (n=5) and failing hearts (n=5). Western analysis of the expression levels of multiple iPLA<sub>2</sub>γ isoforms in human myocardium mitochondria was performed utilizing a polyclonal anti-iPLA<sub>2</sub>γ antibody (upper left panel). Human recombinant iPLA<sub>2</sub>γ (63 kDa) and ANT were used as a positive control and a loading control, respectively. For identification of iPLA<sub>2</sub>γ isoforms, Western analysis of iPLA<sub>2</sub>γ from murine wild-type and iPLA<sub>2</sub>γ germline-knockout mouse heart is shown in the upper right panel. The intensities of immunoreactive bands at 74, 63 and 52 kDa identified as isoforms of iPLA<sub>2</sub>γ were normalized to ANT and compared between control versus failing heart (lower panel). \*p<0.05.

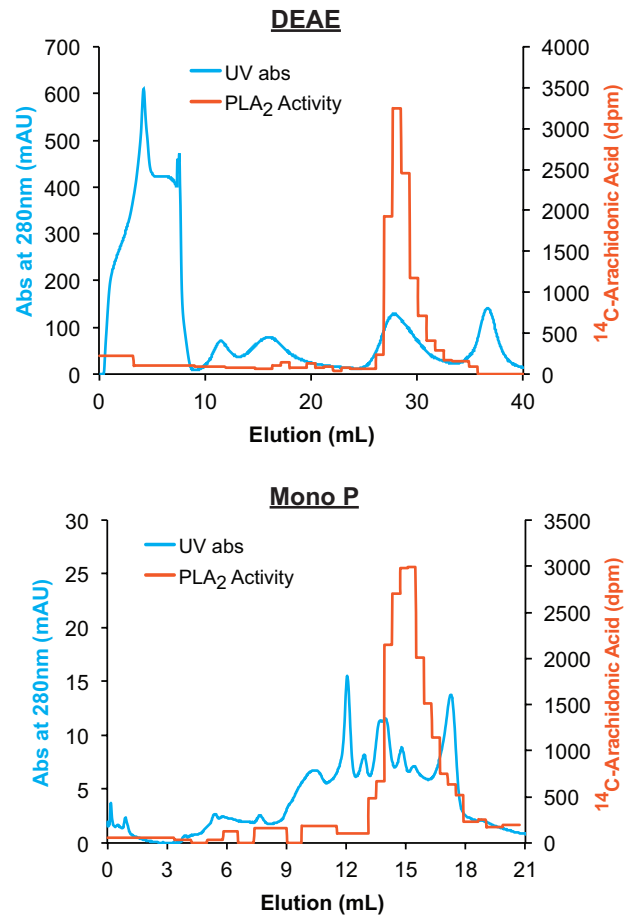

**Supplemental Figure 4.** Chromatographic purification of human myocardial mitochondrial phospholipase A<sub>2</sub>. Mitochondria (8 mg) isolated from non-failing human myocardium were resuspended in highly basic buffer, sonicated, and centrifuged at 100,000×g for 1h. The soluble fraction was then purified by DEAE chromatography utilizing a NaCl gradient (upper panel) followed by chromatofocusing using a Mono P column (pH 6.0-4.0) (lower panel) as described in “Experimental Procedures.” Protein eluted from each column was monitored by UV absorbance (280 nm) and active fractions were identified by a radioactive assay for PLA<sub>2</sub> activity as described in “Experimental Procedures”.

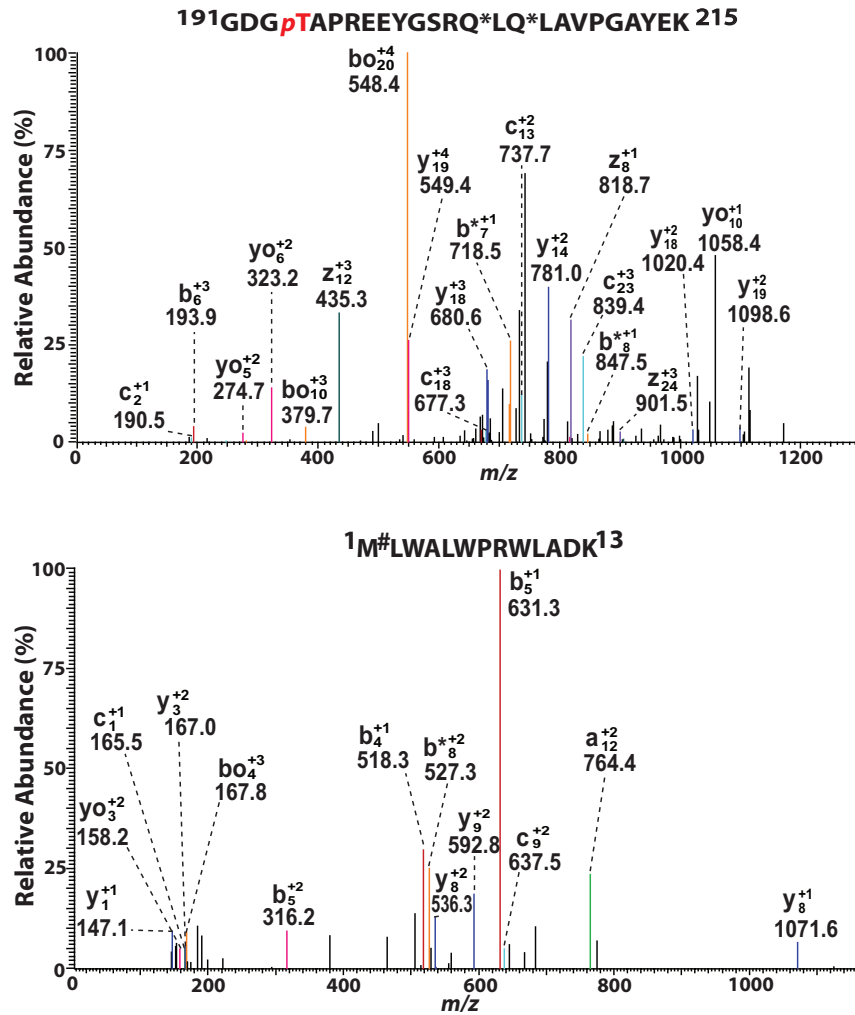

**Supplemental Figure 5.** Identification of the purified human myocardial mitochondrial PLA<sub>2</sub> as cPLA<sub>2</sub>ζ by mass spectrometric proteomic analysis. Mono Q fractions with high PLA<sub>2</sub> activity were electrophoresed by SDS-PAGE and silver-stained. Regions of the gel corresponding to the band labeled by desthiobiotin-fluorophosphonate were trypsinized and analyzed by mass spectrometry (NanoLC-MS/MS) utilizing a protein sequence database using the SEQUEST algorithm. Mass spectra for two peptides identified as tryptic fragments of cPLA<sub>2</sub>ζ are shown. *p*: phosphorylation; #: oxidation; \*: deamidation.
